# Supplementary material for: Single Nucleotide Polymorphisms in MicroRNA Binding Sites: Implications in Colorectal Cancer
Source: Hindawi journal article supplement (doi:10.1155/2014/547154), 2014-01-01

**Table 1s: Complete details of the miRNA and the SNPs in their target sites.**

|                | rsID            | miRNA           | Allele Change    |       |
|----------------|-----------------|-----------------|------------------|-------|
| RFFL           | 1859248         | hsa-miR-3607-3p | A==>G            |       |
|                |                 | hsa-miR-3607-3p | C==>G            |       |
|                |                 | hsa-miR-4268    | A==>G            |       |
|                |                 | hsa-miR-4268    | A==>T            |       |
|                |                 | hsa-miR-4268    | C==>G            |       |
|                |                 | hsa-miR-4268    | C==>T            |       |
|                |                 | hsa-miR-4268    | G==>T            |       |
|                |                 | hsa-miR-4446-3p | A==>G            |       |
|                |                 | hsa-miR-4446-3p | C==>G            |       |
|                |                 | hsa-miR-4495    | A==>T            |       |
|                |                 | hsa-miR-4495    | C==>T            |       |
|                |                 | hsa-miR-4495    | G==>T            |       |
|                |                 | hsa-miR-4675    | A==>G            |       |
|                |                 | hsa-miR-4675    | C==>G            |       |
|                |                 | hsa-miR-4691-5p | A==>G            |       |
|                |                 | hsa-miR-4691-5p | C==>G            |       |
|                |                 | hsa-miR-4741    | A==>G            |       |
|                |                 | hsa-miR-4741    | C==>G            |       |
|                |                 | 3744358         | hsa-miR-3916     | G==>T |
|                |                 |                 | hsa-miR-1294     | A==>G |
|                | hsa-miR-1294    |                 | C==>G            |       |
|                | hsa-miR-141-3p  |                 | A==>C            |       |
|                | hsa-miR-200a-3p |                 | A==>C            |       |
|                | hsa-miR-3143    |                 | A==>T            |       |
|                | hsa-miR-3143    |                 | C==>T            |       |
|                | hsa-miR-3143    |                 | G==>T            |       |
|                | hsa-miR-568     |                 | A==>G            |       |
|                | hsa-miR-568     |                 | C==>G            |       |
|                | hsa-miR-568     |                 | C==>T            |       |
|                | 12947086        |                 | hsa-miR-1273g-5p | A==>G |
|                |                 | hsa-miR-4534    | A==>G            |       |
|                |                 | hsa-miR-4802-5p | A==>G            |       |
| hsa-miR-766-5p |                 | A==>G           |                  |       |
| APC            | 6594650         | hsa-miR-1322    | A==>C            |       |
|                |                 | hsa-miR-4296    | A==>C            |       |
| FZD1           | 3733961         | hsa-miR-5686    | A==>G            |       |
|                | 1052015         | hsa-miR-135a-5p | A==>C            |       |
|                |                 | hsa-miR-135b-5p | A==>C            |       |

|          |          |                  |       |
|----------|----------|------------------|-------|
|          |          | hsa-miR-3607-5p  | A==>C |
|          |          | hsa-miR-4501     | A==>C |
|          |          | hsa-miR-4666a-5p | A==>C |
|          | 3750145  | hsa-miR-4739     | A==>G |
|          |          | hsa-miR-4756-5p  | A==>G |
|          |          | hsa-miR-765      | A==>G |
|          | 13403275 | hsa-miR-4497     | A==>G |
| FZD10    | 1046890  | hsa-miR-4753-5p  | C==>T |
|          |          | hsa-miR-5007-5p  | C==>T |
|          | 1046893  | hsa-miR-4719     | C==>G |
|          | 1046895  | hsa-miR-3679-3p  | A==>G |
|          |          | hsa-miR-629-3p   | A==>G |
|          | 3741568  | hsa-miR-4698     | A==>G |
|          | 4760085  | hsa-miR-5683     | C==>G |
| PRICKLE2 | 14056    | hsa-miR-371b-5p  | A==>G |
|          |          | hsa-miR-373-5p   | A==>G |
|          | 26937    | hsa-miR-1292     | A==>C |
|          |          | hsa-miR-2392     | A==>C |
|          |          | hsa-miR-4448     | A==>C |
|          | 26938    | hsa-miR-552      | G==>T |
|          | 26939    | hsa-miR-92b-5p   | A==>G |
|          | 27383    | hsa-miR-4286     | A==>G |
|          |          | hsa-miR-4758-3p  | A==>G |
|          | 153732   | hsa-miR-4490     | A==>G |
|          | 17069879 | hsa-miR-320e     | A==>G |
|          |          | hsa-miR-3191-5p  | C==>G |
|          |          | hsa-miR-3192     | C==>G |
|          |          | hsa-miR-326      | C==>G |
|          |          | hsa-miR-330-5p   | C==>G |
|          |          | hsa-miR-4300     | C==>G |
|          |          | hsa-miR-4314     | C==>G |
|          |          | hsa-miR-5591-5p  | C==>G |
|          |          | hsa-miR-920      | C==>G |
| SFRP1    | 1127379  | hsa-miR-1266     | A==>G |
|          |          | hsa-miR-3127-5p  | A==>G |
|          |          | hsa-miR-3614-5p  | A==>G |
|          | 3242     | hsa-miR-4789-3p  | C==>T |
| PDGFRA   | 7680422  | hsa-miR-1256     | A==>C |
|          | 1565664  | hsa-miR-4452     | G==>T |
|          |          | hsa-miR-4520a-5p | G==>T |
|          |          | hsa-miR-4520b-5p | G==>T |
| KRAS     | 712      | hsa-miR-200b-3p  | G==>T |
|          |          | hsa-miR-200c-3p  | G==>T |

|        |          |                 |       |
|--------|----------|-----------------|-------|
|        |          | hsa-miR-3125    | G==>T |
|        |          | hsa-miR-330-5p  | G==>T |
|        |          | hsa-miR-3916    | G==>T |
|        |          | hsa-miR-4646-5p | G==>T |
|        |          | hsa-miR-514a-5p | G==>T |
|        |          | hsa-miR-877-5p  | G==>T |
|        | 9266     | hsa-miR-181a-5p | C==>T |
|        |          | hsa-miR-181b-5p | C==>T |
|        |          | hsa-miR-181c-5p | C==>T |
|        |          | hsa-miR-181d    | C==>T |
|        |          | hsa-miR-4262    | C==>T |
|        | 12587    | hsa-miR-506-5p  | A==>C |
|        | 13096    | hsa-miR-3177-5p | A==>G |
|        |          | hsa-miR-4646-3p | A==>G |
|        | 1137282  | hsa-miR-2681-5p | A==>T |
|        |          | hsa-miR-2681-5p | C==>T |
|        | 7960917  | hsa-miR-5700    | C==>T |
|        | 7973623  | hsa-miR-4495    | A==>G |
| RAF1   | 12808    | hsa-miR-4274    | C==>T |
|        |          | hsa-miR-4291    | C==>T |
|        |          | hsa-miR-4750    | C==>T |
|        | 5746246  | hsa-miR-548an   | C==>T |
|        | 5746247  | hsa-miR-1269a   | C==>T |
|        |          | hsa-miR-1269b   | C==>T |
| ACVR2A | 2854464  | hsa-miR-149-5p  | A==>G |
|        | 6734630  | hsa-miR-124-3p  | A==>G |
|        |          | hsa-miR-506-3p  | A==>G |
|        | 11831802 | hsa-miR-411-5p  | C==>T |
|        | 12993800 | hsa-miR-5583-3p | C==>T |
|        | 13430086 | hsa-miR-876-5p  | A==>T |
|        | 17692648 | hsa-miR-508-3p  | A==>C |
| SMAD2  | 1981     | hsa-miR-100-3p  | C==>T |
|        | 1792671  | hsa-miR-302b-5p | A==>G |
|        |          | hsa-miR-302d-5p | A==>G |
|        | 8085335  | hsa-miR-3653    | A==>G |
|        | 8086227  | hsa-miR-645     | A==>G |
|        | 8098413  | hsa-miR-3171    | C==>T |
|        |          | hsa-miR-32-3p   | C==>T |
|        | 16958495 | hsa-miR-3975    | A==>G |
|        | 16958497 | hsa-miR-4264    | A==>T |
|        |          | hsa-miR-4711-5p | A==>T |
|        |          | hsa-miR-622     | A==>T |
|        |          | hsa-miR-767-3p  | A==>T |

|       |          |                  |       |
|-------|----------|------------------|-------|
|       | 16958498 | hsa-miR-181b-5p  | C==>T |
|       |          | hsa-miR-181d     | C==>T |
|       |          | hsa-miR-3688-3p  | C==>T |
|       |          | hsa-miR-5003-5p  | C==>T |
|       | 16958499 | hsa-miR-10b-3p   | A==>C |
|       |          | hsa-miR-4495     | A==>C |
|       |          | hsa-miR-513a-3p  | A==>C |
|       |          | hsa-miR-513c-3p  | A==>C |
|       | 16958501 | hsa-let-7a-3p    | G==>T |
|       |          | hsa-let-7b-3p    | G==>T |
|       |          | hsa-let-7f-1-3p  | G==>T |
|       |          | hsa-miR-5011-5p  | G==>T |
|       | 16958509 | hsa-miR-224-3p   | C==>T |
|       |          | hsa-miR-522-3p   | C==>T |
| SMAD3 | 1052488  | hsa-miR-20a-3p   | C==>T |
|       |          | hsa-miR-544a     | C==>T |
|       | 3743342  | hsa-miR-3609     | C==>T |
|       |          | hsa-miR-518a-5p  | C==>T |
|       |          | hsa-miR-520g     | C==>T |
|       |          | hsa-miR-520h     | C==>T |
|       |          | hsa-miR-527      | C==>T |
|       |          | hsa-miR-548ah-5p | C==>T |
|       | 8031440  | hsa-miR-490-3p   | A==>G |
|       |          | hsa-miR-619      | A==>G |
|       |          | hsa-miR-676-5p   | A==>G |
|       | 8031627  | hsa-miR-596      | A==>G |
|       | 11556090 | hsa-miR-188-3p   | A==>G |
|       |          | hsa-miR-212-3p   | A==>G |
|       |          | hsa-miR-4433-5p  | A==>G |
|       |          | hsa-miR-5588-3p  | A==>G |
|       | 12900401 | hsa-miR-3611     | C==>T |
|       |          | hsa-miR-935      | C==>T |
| SMAD4 | 4940037  | hsa-miR-3686     | A==>G |
|       |          | hsa-miR-4766-5p  | A==>G |
|       | 16952798 | hsa-miR-4775     | A==>C |
|       |          | hsa-miR-4775     | A==>C |
|       |          | hsa-miR-590-3p   | A==>C |
| BCL2  | 1016860  | hsa-miR-27a-5p   | A==>G |
|       |          | hsa-miR-3127-5p  | A==>G |
|       |          | hsa-miR-3158-3p  | A==>G |
|       |          | hsa-miR-4720-3p  | A==>G |
|       | 1564483  | hsa-miR-4440     | A==>G |
|       | 3744937  | hsa-miR-3911     | C==>T |

|        |         |                  |       |
|--------|---------|------------------|-------|
|        | 4987843 | hsa-miR-1250     | A==>G |
|        |         | hsa-miR-449b-3p  | A==>G |
|        |         | hsa-miR-4746-3p  | A==>G |
|        |         | hsa-miR-636      | A==>G |
|        | 4987847 | hsa-miR-338-3p   | A==>G |
|        |         | hsa-miR-4310     | A==>G |
|        | 4987848 | hsa-miR-1234     | A==>G |
|        |         | hsa-miR-4269     | A==>G |
|        | 4987850 | hsa-miR-3922-5p  | A==>G |
|        |         | hsa-miR-4753-5p  | A==>G |
|        | 4987852 | hsa-miR-1229     | A==>G |
|        | 4987853 | hsa-miR-1298     | A==>G |
|        |         | hsa-miR-4686     | A==>G |
|        | 4987854 | hsa-miR-497-3p   | A==>G |
|        | 4987855 | hsa-miR-3943     | A==>G |
|        |         | hsa-miR-4779     | A==>G |
|        | 4987856 | hsa-miR-3160-5p  | A==>G |
|        | 4987859 | hsa-miR-3944-5p  | A==>G |
|        | 4987861 | hsa-miR-4722-3p  | C==>T |
|        |         | hsa-miR-4762-5p  | C==>T |
|        | 4987865 | hsa-miR-4729     | A==>G |
|        |         | hsa-miR-548a-3p  | A==>G |
|        | 4987868 | hsa-miR-1276     | A==>C |
|        |         | hsa-miR-548l     | A==>C |
|        |         | hsa-miR-548n     | A==>C |
|        | 4987869 | hsa-miR-3688-3p  | A==>C |
|        |         | hsa-miR-3978     | A==>C |
| AXIN1  | 394128  | hsa-miR-3649     | C==>T |
|        | 393521  | hsa-miR-653      | G==>T |
| MET    | 1621    | hsa-miR-1284     | A==>G |
|        | 41739   | hsa-miR-335-3p   | A==>G |
|        |         | hsa-miR-644b-3p  | A==>G |
| AXIN2  | 7591    | hsa-miR-548d-3p  | A==>T |
|        |         | hsa-miR-548h-3p  | A==>T |
|        |         | hsa-miR-548z     | A==>T |
| TCF7L2 | 1056877 | hsa-miR-330-3p   | C==>T |
|        |         | hsa-miR-548aa    | C==>T |
|        |         | hsa-miR-548ap-3p | C==>T |
|        |         | hsa-miR-548t-3p  | C==>T |
| CCND1  | 7177    | hsa-miR-939      | A==>C |
|        | 7178    | hsa-miR-4757-5p  | A==>G |
|        | 3212895 | hsa-miR-4753-3p  | A==>G |
|        |         | hsa-miR-942      | A==>G |

|        |          |                  |       |
|--------|----------|------------------|-------|
|        | 3212896  | hsa-miR-3132     | G==>T |
|        |          | hsa-miR-4650-3p  | G==>T |
|        |          | hsa-miR-570-3p   | G==>T |
|        | 3212905  | hsa-miR-155-3p   | A==>G |
|        | 3212908  | hsa-miR-214-3p   | C==>T |
|        |          | hsa-miR-3619-5p  | C==>T |
|        |          | hsa-miR-761      | C==>T |
| MLH3   | 108621   | hsa-miR-3190-5p  | C==>T |
|        |          | hsa-miR-338-3p   | C==>T |
|        | 108622   | hsa-miR-4307     | A==>G |
|        |          | hsa-miR-548ai    | A==>G |
|        |          | hsa-miR-570-5p   | A==>G |
|        | 175049   | hsa-miR-573      | C==>T |
| TP53   | 4968187  | hsa-miR-3168     | C==>T |
|        | 17882252 | hsa-miR-3615     | A==>G |
|        | 17879353 | hsa-miR-4524b-3p | A==>C |
| PTEN   | 701848   | hsa-miR-3658     | C==>T |
| EPCAM  | 11554292 | hsa-miR-466      | A==>T |
| POLE   | 14302    | hsa-miR-1343     | C==>T |
|        |          | hsa-miR-145-3p   | C==>T |
|        |          | hsa-miR-2110     | C==>T |
|        |          | hsa-miR-4667-5p  | C==>T |
|        |          | hsa-miR-4700-5p  | C==>T |
|        |          | hsa-miR-4782-5p  | C==>T |
|        |          | hsa-miR-5706     | C==>T |
|        | 5745091  | hsa-miR-1200     | A==>G |
|        |          | hsa-miR-3660     | A==>G |
|        |          | hsa-miR-4478     | A==>G |
|        |          | hsa-miR-4526     | A==>G |
|        |          | hsa-miR-4649-3p  | A==>G |
|        |          | hsa-miR-485-5p   | A==>G |
|        |          | hsa-miR-544b     | A==>G |
| CDH1   | 13689    | hsa-miR-4435     | A==>C |
|        |          | hsa-miR-4435     | A==>T |
|        |          | hsa-miR-4435     | C==>T |
|        |          | hsa-miR-4435     | G==>T |
|        | 9282654  | hsa-miR-4786-3p  | G==>T |
|        |          | hsa-miR-583      | G==>T |
| CDKN2A | 3088440  | hsa-miR-1291     | A==>G |
|        |          | hsa-miR-1291     | C==>G |
|        |          | hsa-miR-1908     | A==>C |
|        |          | hsa-miR-1908     | A==>T |
|        |          | hsa-miR-1908     | C==>T |

|        |          |                  |       |
|--------|----------|------------------|-------|
|        |          | hsa-miR-1908     | G==>T |
|        |          | hsa-miR-328      | A==>G |
|        |          | hsa-miR-328      | C==>G |
|        |          | hsa-miR-548au-3p | C==>T |
|        |          | hsa-miR-548au-3p | G==>T |
|        |          | hsa-miR-663a     | C==>G |
|        |          | hsa-miR-663b     | A==>G |
|        |          | hsa-miR-663b     | C==>G |
|        |          | hsa-miR-744-3p   | A==>T |
|        |          | hsa-miR-744-3p   | C==>T |
|        |          | hsa-miR-744-3p   | G==>T |
|        |          | hsa-miR-874      | A==>T |
|        |          | hsa-miR-874      | C==>T |
|        |          | hsa-miR-874      | G==>T |
|        | 3731255  | hsa-miR-125b-5p  | C==>G |
|        |          | hsa-miR-138-1-3p | C==>G |
|        | 6413463  | hsa-miR-3683     | A==>T |
| TGFBR1 | 1590     | hsa-miR-4286     | A==>C |
|        |          | hsa-miR-4758-3p  | A==>C |
|        | 334349   | hsa-miR-3612     | A==>G |
|        |          | hsa-miR-650      | A==>G |
|        | 420549   | hsa-miR-4753-3p  | C==>G |
|        | 3739798  | hsa-miR-297      | C==>T |
|        |          | hsa-miR-548ag    | C==>T |
|        |          | hsa-miR-548ai    | C==>T |
|        |          | hsa-miR-570-5p   | C==>T |
|        | 7850895  | hsa-miR-374a-5p  | C==>T |
|        |          | hsa-miR-374b-5p  | C==>T |
|        |          | hsa-miR-5692b    | C==>T |
|        |          | hsa-miR-5692c    | C==>T |
|        | 10988732 | hsa-miR-384      | C==>T |
| TGFBR2 | 11466531 | hsa-miR-5708     | C==>G |
|        | 11466533 | hsa-miR-4329     | A==>G |
|        | 11466534 | hsa-miR-2114-5p  | A==>G |
|        |          | hsa-miR-3183     | A==>G |
|        |          | hsa-miR-4723-3p  | A==>G |
|        |          | hsa-miR-642a-5p  | A==>G |
|        | 11466536 | hsa-miR-130a-3p  | C==>T |
|        |          | hsa-miR-130b-3p  | C==>T |
|        |          | hsa-miR-139-5p   | C==>T |
|        |          | hsa-miR-148a-3p  | C==>T |
|        |          | hsa-miR-148b-3p  | C==>T |
|        |          | hsa-miR-152      | C==>T |

|         |          |                 |       |
|---------|----------|-----------------|-------|
|         |          | hsa-miR-301a-3p | C==>T |
|         |          | hsa-miR-301b    | C==>T |
|         |          | hsa-miR-3666    | C==>T |
|         |          | hsa-miR-4295    | C==>T |
|         |          | hsa-miR-454-3p  | C==>T |
|         | 11466537 | hsa-miR-1193    | A==>T |
|         | 17026332 | hsa-miR-29a-5p  | A==>C |
|         |          | hsa-miR-4762-3p | A==>C |
| NRAS    | 14804    | hsa-miR-5007-3p | C==>T |
|         |          | hsa-miR-944     | C==>T |
|         | 1815675  | hsa-miR-3143    | G==>T |
|         | 1988092  | hsa-miR-4328    | A==>T |
|         |          | hsa-miR-4477b   | A==>T |
|         | 2793257  | hsa-miR-2110    | C==>G |
|         |          | hsa-miR-4261    | C==>G |
|         |          | hsa-miR-450a-3p | C==>G |
|         | 9724642  | hsa-miR-1282    | A==>G |
|         | 10516369 | hsa-miR-1324    | A==>T |
|         |          | hsa-miR-589-3p  | A==>T |
| IGF2    | 7873     | hsa-miR-3191-3p | A==>G |
| DCC     | 2270954  | hsa-miR-4759    | A==>C |
|         |          | hsa-miR-5190    | A==>C |
|         | 12607853 | hsa-miR-4704-5p | C==>T |
|         |          | hsa-miR-590-3p  | C==>T |
|         | 16956878 | hsa-miR-128     | C==>T |
|         |          | hsa-miR-3681-3p | C==>T |
| SOX9    | 1042667  | hsa-miR-1181    | A==>C |
| FAM123B | 3810701  | hsa-miR-1973    | A==>C |
|         |          | hsa-miR-4536-3p | A==>C |
|         | 5964736  | hsa-miR-450a-3p | C==>T |
|         | 28653713 | hsa-miR-579     | G==>T |
|         |          | hsa-miR-644b-3p | G==>T |



**Table 2s: Complete table showing details of the miRNA and the SNPs with in their target sites. These suggest overexpression due to site breakage or decreased binding efficiency.**

| Gene Symbol | rs ID   | miRNAs          | Allele Change |
|-------------|---------|-----------------|---------------|
| RFFL        | 3744358 | hsa-miR-1252    | G==>T         |
|             |         | hsa-miR-1294    | G==>T         |
|             |         | hsa-miR-141-3p  | C==>G         |
|             |         | hsa-miR-141-3p  | C==>T         |
|             |         | hsa-miR-1294    | G==>T         |
|             |         | hsa-miR-141-3p  | C==>G         |
|             |         | hsa-miR-141-3p  | C==>T         |
|             |         | hsa-miR-200a-3p | C==>G         |
|             |         | hsa-miR-200a-3p | C==>T         |
|             |         | hsa-miR-296-3p  | A==>C         |
|             | 1859248 | hsa-miR-296-3p  | A==>G         |
|             |         | hsa-miR-296-3p  | A==>T         |
|             |         | hsa-miR-3607-3p | G==>T         |
|             |         | hsa-miR-4446-3p | G==>T         |
|             |         | hsa-miR-4675    | G==>T         |
|             |         | hsa-miR-4691-5p | G==>T         |
|             |         | hsa-miR-4741    | G==>T         |
|             |         | hsa-miR-568     | A==>C         |
|             |         | hsa-miR-568     | A==>T         |
|             |         | 3744359         | hsa-miR-568   |

|       |          |                  |       |
|-------|----------|------------------|-------|
|       |          | hsa-miR-568      | G==>T |
|       | 12947086 | hsa-miR-629-5p   | A==>G |
| APC   | 6875894  | hsa-miR-135a-5p  | C==>T |
|       |          | hsa-miR-135b-5p  | C==>T |
|       |          | hsa-miR-3671     | C==>T |
|       |          | hsa-miR-5583-3p  | C==>T |
| FZD1  | 1052015  | hsa-miR-514a-3p  | A==>C |
|       |          | hsa-miR-514b-3p  | A==>C |
|       | 3731568  | hsa-miR-3613-3p  | A==>C |
|       | 3750145  | hsa-miR-219-2-3p | A==>G |
|       |          | hsa-miR-766-5p   | A==>G |
|       | 13403275 | hsa-miR-4768-3p  | A==>G |
|       |          | hsa-miR-576-5p   | A==>G |
| FZD5  | 13403275 | hsa-miR-665      | A==>G |
| FZD10 | 1046890  | hsa-miR-4294     | C==>T |
|       |          | hsa-miR-4743     | C==>T |
|       | 1046893  | hsa-miR-455-3p   | C==>G |
|       | 1046895  | hsa-miR-1236     | A==>G |
|       | 3741568  | hsa-miR-4766-5p  | A==>G |
|       |          | hsa-miR-488-3p   | A==>G |
|       | 4760085  | hsa-miR-1321     | C==>G |
|       |          | hsa-miR-149-3p   | C==>G |
|       |          | hsa-miR-3162-5p  | C==>G |

|          |          |                  |       |
|----------|----------|------------------|-------|
|          |          | hsa-miR-4728-5p  | C==>G |
|          |          | hsa-miR-4739     | C==>G |
|          |          | hsa-miR-4756-5p  | C==>G |
| PRIKCLE2 | 14056    | hsa-miR-3688-5p  | A==>G |
|          |          | hsa-miR-616-5p   | A==>G |
|          | 26937    | hsa-miR-4426     | A==>C |
|          |          | hsa-miR-4477b    | A==>C |
|          |          | hsa-miR-4647     | A==>C |
|          |          | hsa-miR-4662b    | A==>C |
|          | 26939    | hsa-miR-4314     | A==>G |
|          | 27383    | hsa-miR-3916     | A==>G |
|          | 12494731 | hsa-miR-4534     | G==>T |
|          |          | hsa-miR-4802-5p  | G==>T |
|          |          | hsa-miR-766-5p   | G==>T |
|          | 17069879 | hsa-miR-582-3p   | A==>G |
|          | 17069880 | hsa-miR-216b     | C==>G |
| SFRP1    | 3242     | hsa-miR-3662     | C==>T |
|          | 13635    | hsa-miR-126-5p   | A==>G |
|          |          | hsa-miR-944      | A==>G |
| PDGFRA   | 1565664  | hsa-miR-1273g-5p | G==>T |
|          |          | hsa-miR-3074-5p  | G==>T |
|          | 7680422  | hsa-miR-1256     | C==>G |
|          |          | hsa-miR-20a-3p   | A==>C |

|      |         |                  |       |
|------|---------|------------------|-------|
|      |         | hsa-miR-20a-3p   | A==>G |
|      |         | hsa-miR-33a-5p   | A==>G |
|      |         | hsa-miR-33b-5p   | A==>C |
|      |         | hsa-miR-33b-5p   | A==>G |
| KRAS | 13096   | hsa-let-7g-3p    | A==>G |
|      |         | hsa-miR-2355-3p  | A==>G |
|      |         | hsa-miR-676-3p   | A==>G |
|      | 1137188 | hsa-miR-1290     | C==>T |
|      |         | hsa-miR-541-5p   | C==>T |
|      |         | hsa-miR-511      | C==>T |
|      |         | hsa-miR-1248     | A==>C |
|      |         | hsa-miR-1248     | A==>T |
|      |         | hsa-miR-4724-3p  | A==>C |
|      |         | hsa-miR-4724-3p  | A==>T |
|      | 7960917 | hsa-miR-3912     | C==>T |
|      | 7973450 | hsa-miR-302c-5p  | A==>G |
| RAF1 | 12808   | hsa-miR-5007-5p  | C==>T |
|      | 1051208 | hsa-miR-4436b-5p | C==>T |
|      | 5746246 | hsa-miR-4685-5p  | C==>T |
|      |         | hsa-miR-370      | C==>T |
|      |         | hsa-miR-378f     | C==>T |
|      |         | hsa-miR-378h     | C==>T |
|      |         | hsa-miR-4498     | C==>T |

|        |          |                 |       |
|--------|----------|-----------------|-------|
|        |          | hsa-miR-5001-5p | C==>T |
|        |          | hsa-miR-5002-3p | C==>T |
|        |          | hsa-miR-762     | C==>T |
| ACVR2A | 2854464  | hsa-miR-5580-5p | A==>G |
|        | 4664229  | hsa-miR-4771    | C==>T |
|        | 10167207 | hsa-miR-362-5p  | A==>C |
|        | 12993800 | hsa-miR-4298    | C==>T |
|        |          | hsa-miR-4645-3p | C==>T |
|        |          | hsa-miR-1302    | C==>T |
|        |          | hsa-miR-545-5p  | C==>T |
| SMAD2  | 1981     | hsa-miR-4766-5p | C==>T |
|        |          | hsa-miR-488-3p  | C==>T |
|        | 1792666  | hsa-miR-3145-3p | A==>T |
|        |          | hsa-miR-5695    | A==>T |
|        | 8085335  | hsa-miR-3133    | A==>G |
|        | 8086227  | hsa-miR-151a-3p | A==>G |
|        |          | hsa-miR-4463    | A==>G |
|        |          | hsa-miR-5583-3p | A==>G |
|        | 16958497 | hsa-miR-4700-3p | A==>T |
|        |          | hsa-miR-4738-3p | A==>T |
|        |          | hsa-miR-4772-3p | A==>T |
|        | 16958498 | hsa-miR-181a-5p | C==>T |
|        |          | hsa-miR-543     | C==>T |

|       |          |                 |       |
|-------|----------|-----------------|-------|
|       | 16958499 | hsa-miR-205-3p  | A==>C |
|       | 16958501 | hsa-miR-4638-5p | G==>T |
|       | 16958509 | hsa-miR-553     | C==>T |
|       | 16958520 | hsa-miR-2053    | A==>G |
| SMAD3 | 1052488  | hsa-miR-3682-5p | C==>T |
|       | 3743342  | hsa-miR-2276    | C==>T |
|       |          | hsa-miR-4761-5p | C==>T |
|       | 3743343  | hsa-miR-4679    | C==>T |
|       | 8025774  | hsa-miR-1249    | C==>T |
|       |          | hsa-miR-5687    | C==>T |
|       | 8031440  | hsa-miR-1299    | A==>G |
|       |          | hsa-miR-3065-5p | A==>G |
|       | 8031627  | hsa-miR-3691-3p | A==>G |
|       | 11556090 | hsa-miR-132-3p  | A==>G |
|       |          | hsa-miR-155-3p  | A==>G |
|       |          | hsa-miR-1910    | A==>G |
|       | 12900401 | hsa-miR-409-5p  | C==>T |
|       |          | hsa-miR-4289    | C==>T |
| SMAD4 | 2282544  | hsa-miR-186-3p  | C==>G |
|       |          | hsa-miR-330-3p  | C==>G |
|       |          | hsa-miR-4646-3p | C==>G |
|       | 3819122  | hsa-miR-4517    | G==>T |
|       | 4940037  | hsa-miR-186-5p  | A==>G |

## BCL2

|          |                  |       |
|----------|------------------|-------|
| 16952798 | hsa-miR-4775     | A==>C |
|          | hsa-miR-590-3p   | A==>C |
| 1016860  | hsa-miR-4789-5p  | A==>G |
|          | hsa-miR-629-5p   | A==>G |
| 1564483  | hsa-miR-296-3p   | A==>G |
|          | hsa-miR-4474-3p  | A==>G |
|          | hsa-miR-3653     | A==>G |
|          | hsa-miR-4666a-5p | A==>G |
| 4987846  | hsa-miR-4761-3p  | A==>G |
| 4987847  | hsa-miR-16-1-3p  | A==>G |
|          | hsa-miR-4676-5p  | A==>G |
|          | hsa-miR-575      | A==>G |
| 4987848  | hsa-miR-4690-5p  | A==>G |
| 4987850  | hsa-miR-455-5p   | A==>G |
|          | hsa-miR-4717-5p  | A==>G |
| 4987851  | hsa-miR-3162-3p  | A==>G |
|          | hsa-miR-642b-5p  | A==>G |
| 4987852  | hsa-miR-1285-5p  | A==>G |
|          | hsa-miR-27a-5p   | A==>G |
| 4987853  | hsa-miR-4776-3p  | A==>G |
|          | hsa-miR-579      | A==>G |
|          | hsa-miR-644b-3p  | A==>G |
| 4987854  | hsa-miR-3974     | A==>G |

## AXIN1

|         |                 |       |
|---------|-----------------|-------|
| 4987855 | hsa-miR-4779    | A==>G |
| 4987856 | hsa-miR-122-5p  | A==>G |
| 4987858 | hsa-miR-199a-5p | C==>T |
|         | hsa-miR-2467-3p | C==>T |
|         | hsa-miR-3678-3p | C==>T |
| 4987859 | hsa-miR-143-5p  | A==>G |
| 4987861 | hsa-miR-4722-3p | C==>T |
|         | hsa-miR-4762-5p | C==>T |
| 4987865 | hsa-miR-217     | A==>G |
|         | hsa-miR-448     | A==>G |
|         | hsa-miR-548e    | A==>G |
| 4987867 | hsa-miR-4641    | A==>G |
| 4987868 | hsa-miR-548l    | A==>C |
|         | hsa-miR-548n    | A==>C |
| 4987869 | hsa-miR-4495    | A==>C |
| 393521  | hsa-miR-320e    | G==>T |
|         | hsa-miR-3940-5p | G==>T |
|         | hsa-miR-4507    | G==>T |
| 394128  | hsa-miR-1913    | C==>T |
|         | hsa-miR-324-3p  | C==>T |
|         | hsa-miR-4286    | C==>T |
|         | hsa-miR-4758-3p | C==>T |
| 393521  | hsa-miR-5589-5p | G==>T |



|        |                 |                   |       |
|--------|-----------------|-------------------|-------|
| MET    | 1621            | hsa-miR-199a-3p   | A==>G |
|        |                 | hsa-miR-199b-3p   | A==>G |
|        |                 | hsa-miR-3129-5p   | A==>G |
|        | 41738           | hsa-miR-4666a-5p  | A==>G |
| TCF7L2 | 3793883         | hsa-miR-296-3p    | C==>G |
| CCND1  | 7177            | hsa-miR-4697-3p   | A==>C |
|        | 7178            | hsa-miR-3941      | A==>G |
|        | 678653          | hsa-miR-602       | C==>G |
|        | 3212896         | hsa-miR-197-5p    | G==>T |
|        |                 | hsa-miR-338-3p    | G==>T |
|        |                 | hsa-miR-548aa     | G==>T |
|        |                 | hsa-miR-548ap-3p  | G==>T |
|        |                 | hsa-miR-548t-3p   | G==>T |
|        |                 | hsa-miR-634       | G==>T |
|        | 3212897         | hsa-miR-125b-2-3p | G==>T |
|        |                 | hsa-miR-4327      | G==>T |
|        |                 | hsa-miR-4731-3p   | G==>T |
|        |                 | hsa-miR-4801      | G==>T |
|        | 3212901         | hsa-miR-2278      | A==>C |
|        | 3212908         | hsa-miR-342-5p    | C==>T |
|        | hsa-miR-4664-5p | C==>T             |       |
|        | hsa-miR-4781-5p | C==>T             |       |
| MLH3   | 108621          | hsa-miR-193a-3p   | C==>T |

|       |          |                   |       |
|-------|----------|-------------------|-------|
|       |          | hsa-miR-193a-3p   | C==>T |
|       |          | hsa-miR-4435      | C==>T |
|       |          | hsa-miR-3145-3p   | A==>G |
| TP53  | 17879353 | hsa-miR-323b-5p   | A==>C |
|       |          | hsa-miR-377-5p    | A==>C |
|       | 17882252 | hsa-miR-4635      | A==>G |
| PTEN  | 701848   | hsa-miR-1304-5p   | C==>T |
|       |          | hsa-miR-5008-5p   | C==>T |
|       | 7221920  | hsa-miR-4650-3p   | A==>G |
|       |          | hsa-miR-4727-5p   | A==>G |
|       | 11202607 | hsa-miR-548at-5p  | C==>T |
|       |          | hsa-miR-5590-3p   | C==>T |
| EPCAM | 1421     | hsa-miR-1277-5p   | A==>G |
|       | 11554292 | hsa-miR-379-3p    | A==>T |
|       |          | hsa-miR-411-3p    | A==>T |
|       | 14302    | hsa-miR-4532      | C==>T |
| POLE  |          | hsa-miR-1182      | A==>G |
|       |          | hsa-miR-125b-1-3p | A==>G |
|       |          | hsa-miR-4782-5p   | A==>G |
|       |          | hsa-miR-5706      | A==>G |
|       | 5745091  | hsa-miR-3929      | A==>G |
| CDH1  | 13689    | hsa-miR-3117-5p   | A==>C |
|       |          | hsa-miR-3117-5p   | A==>G |

|        |          |                  |       |
|--------|----------|------------------|-------|
|        |          | hsa-miR-3117-5p  | A==>T |
|        |          | hsa-miR-4435     | C==>G |
|        |          | hsa-miR-4637     | A==>C |
|        |          | hsa-miR-4637     | A==>G |
|        |          | hsa-miR-4637     | A==>T |
|        | 9282654  | hsa-miR-129-1-3p | G==>T |
|        |          | hsa-miR-129-2-3p | G==>T |
|        |          | hsa-miR-671-5p   | G==>T |
|        |          | hsa-miR-938      | G==>T |
|        | 13339481 | hsa-miR-551b-5p  | C==>T |
| CDKN2A | 11515    | hsa-miR-4502     | C==>G |
|        | 3088440  | hsa-miR-1291     | G==>T |
|        |          | hsa-miR-1908     | C==>G |
|        |          | hsa-miR-328      | G==>T |
|        |          | hsa-miR-486-3p   | A==>C |
|        |          | hsa-miR-486-3p   | A==>G |
|        |          | hsa-miR-486-3p   | A==>T |
|        |          | hsa-miR-548au-3p | A==>C |
|        |          | hsa-miR-548au-3p | A==>G |
|        |          | hsa-miR-548au-3p | A==>T |
|        |          | hsa-miR-663a     | A==>C |
|        |          | hsa-miR-663a     | A==>G |
|        |          | hsa-miR-663a     | A==>T |

|          |     |                 |       |
|----------|-----|-----------------|-------|
|          |     | hsa-miR-663a    | G==>T |
|          |     | hsa-miR-663b    | G==>T |
| 3731249  |     | hsa-miR-132-5p  | A==>G |
|          |     | hsa-miR-4642    | A==>G |
|          |     | hsa-miR-659-5p  | A==>G |
| 6413463  |     | hsa-miR-1306-3p | A==>T |
| 34011899 |     | hsa-miR-1307-3p | A==>C |
|          |     | hsa-miR-3669    | A==>C |
|          |     | hsa-miR-4268    | A==>C |
| TGFBR1   | 868 | hsa-let-7a-5p   | A==>G |
|          |     | hsa-let-7b-5p   | A==>G |
|          |     | hsa-let-7c      | A==>G |
|          |     | hsa-let-7d-5p   | A==>G |
|          |     | hsa-let-7e-5p   | A==>G |
|          |     | hsa-let-7f-5p   | A==>G |
|          |     | hsa-let-7g-5p   | A==>G |
|          |     | hsa-let-7i-5p   | A==>G |
|          |     | hsa-miR-1294    | A==>G |
|          |     | hsa-miR-3927    | A==>G |
|          |     | hsa-miR-4500    | A==>G |
|          |     | hsa-miR-98      | A==>G |
| 334348   |     | hsa-miR-591     | A==>G |
|          |     | hsa-miR-1275    | A==>G |
|          |     | hsa-miR-4447    | A==>G |

|          |                 |                 |       |
|----------|-----------------|-----------------|-------|
|          | hsa-miR-4472    | A==>G           |       |
|          | hsa-miR-4665-5p | A==>G           |       |
|          | hsa-miR-4723-5p | A==>G           |       |
|          | hsa-miR-5698    | A==>G           |       |
| 420549   | hsa-miR-511     | C==>G           |       |
| 3739798  | hsa-miR-4666b   | C==>T           |       |
| 7850895  | hsa-miR-2054    | C==>T           |       |
| 10988732 | hsa-miR-5581-5p | C==>T           |       |
| TGFBR2   | 6550008         | hsa-miR-103a-3p | A==>G |
|          | hsa-miR-107     | A==>G           |       |
|          | hsa-miR-4310    | A==>G           |       |
| 11466531 | hsa-miR-4419a   | C==>G           |       |
|          | hsa-miR-4510    | C==>G           |       |
|          | hsa-miR-5192    | C==>G           |       |
| 11466533 | hsa-miR-204-5p  | A==>G           |       |
|          | hsa-miR-211-5p  | A==>G           |       |
|          | hsa-miR-4446-5p | A==>G           |       |
|          | hsa-miR-4755-5p | A==>G           |       |
|          | hsa-miR-5006-3p | A==>G           |       |
| 11466534 | hsa-miR-1910    | A==>G           |       |
|          | hsa-miR-942     | A==>G           |       |
| 11466537 | hsa-miR-3940-5p | A==>T           |       |
|          | hsa-miR-4507    | A==>T           |       |

|      |          |                   |       |
|------|----------|-------------------|-------|
|      | 17026332 | hsa-miR-2116-5p   | A==>C |
|      |          | hsa-miR-4677-5p   | A==>C |
| NRAS | 14804    | hsa-miR-218-5p    | C==>T |
|      | 2793257  | hsa-miR-3153      | C==>G |
|      |          | hsa-miR-4311      | C==>G |
|      | 9724644  | hsa-miR-181a-2-3p | A==>G |
|      | 10516369 | hsa-miR-101-3p    | A==>T |
|      |          | hsa-miR-3614-3p   | A==>T |
|      |          | hsa-miR-4645-3p   | A==>T |
| IGF2 | 2585     | hsa-miR-28-5p     | C==>T |
|      |          | hsa-miR-3139      | C==>T |
|      |          | hsa-miR-3160-3p   | C==>T |
|      |          | hsa-miR-4682      | C==>T |
|      |          | hsa-miR-708-5p    | C==>T |
|      | 7873     | hsa-miR-185-3p    | A==>G |
|      |          | hsa-miR-4492      | A==>G |
|      |          | hsa-miR-4498      | A==>G |
|      |          | hsa-miR-5001-5p   | A==>G |
|      |          | hsa-miR-762       | A==>G |
|      | 1065687  | hsa-miR-4735-5p   | A==>G |
|      |          | hsa-miR-4775      | A==>G |
|      | 3802971  | hsa-miR-4711-5p   | C==>T |
| DCC  | 2270954  | hsa-miR-17-3p     | A==>C |

|         |          |                 |       |          |
|---------|----------|-----------------|-------|----------|
|         |          | hsa-miR-4504    | A==>C |          |
|         |          | hsa-miR-4641    | A==>C |          |
|         | 2292043  | hsa-miR-3689d   | C==>T |          |
|         | 2292044  | hsa-miR-561-3p  | C==>G |          |
|         | 12607853 | hsa-miR-141-3p  | C==>T |          |
|         |          | hsa-miR-200a-3p | C==>T |          |
|         |          | hsa-miR-3654    | C==>T |          |
|         |          | hsa-miR-378a-3p | C==>T |          |
|         |          | hsa-miR-378b    | C==>T |          |
|         |          | hsa-miR-378c    | C==>T |          |
|         |          | hsa-miR-378d    | C==>T |          |
|         |          | hsa-miR-378e    | C==>T | break    |
|         |          | hsa-miR-378f    | C==>T | break    |
|         |          | hsa-miR-378h    | C==>T | break    |
|         |          | hsa-miR-378i    | C==>T | break    |
|         |          | hsa-miR-422a    | C==>T | break    |
|         |          | hsa-miR-4775    | C==>T | decrease |
|         | 1695687  | hsa-miR-4666a-  |       |          |
|         | 8        | 5p              | C==>T | decrease |
| FAM123B | 3810701  | hsa-miR-148a-3p | A==>C | break    |
|         |          | hsa-miR-148b-3p | A==>C | break    |
|         |          | hsa-miR-152     | A==>C | break    |
|         |          | hsa-miR-2682-5p | A==>C | break    |
|         |          | hsa-miR-34a-5p  | A==>C | break    |
|         |          | hsa-miR-34b-5p  | A==>C | break    |
|         |          | hsa-miR-34c-5p  | A==>C | break    |
|         |          | hsa-miR-449a    | A==>C | break    |
|         |          | hsa-miR-449b-5p | A==>C | break    |
|         |          | hsa-miR-449c-5p | A==>C | break    |
|         |          | hsa-miR-4514    | A==>C | break    |
|         |          | hsa-miR-4692    | A==>C | break    |

|         |                |       |          |
|---------|----------------|-------|----------|
| 5964736 | hsa-miR-2110   | C==>T | decrease |
|         | hsa-miR-4462   | C==>T | break    |
| 2865371 |                |       |          |
| 3       | hsa-miR-223-3p | G==>T | break    |



**Table 3: Expression profiles of selected genes in different body tissues, retrieved from Unigene.**

| TISSUE/GENE       | RFFL | APC | FZD1 | FZD5 | FZD10 | SFRP1 | RAF1 | KRAS | PDGFR A | ACVR2A | SMA D2 | SMA D3 |
|-------------------|------|-----|------|------|-------|-------|------|------|---------|--------|--------|--------|
| ADIPOSE           |      | ●   |      |      |       | ●     | ●    |      | ●       |        | ●      |        |
| ADRENAL GLAND     |      |     |      |      |       |       | ●    |      |         |        | ●      |        |
| ASCITES           |      |     | ●    | ●    |       |       | ●    | ●    |         |        | ●      | ●      |
| BLADDER           |      | ●   | ●    |      |       |       |      | ●    |         |        | ●      |        |
| BLOOD             | ●    | ●   | ●    |      |       |       | ●    | ●    | ●       | ●      | ●      | ●      |
| BONE              |      | ●   | ●    | ●    |       | ●     | ●    | ●    | ●       |        | ●      |        |
| BONE MARROW       | ●    |     |      |      |       |       | ●    | ●    | ●       |        | ●      | ●      |
| BRAIN             | ●    | ●   | ●    | ●    |       | ●     | ●    | ●    | ●       | ●      | ●      |        |
| CERVIX            |      | ●   |      |      | ●     | ●     | ●    | ●    |         |        | ●      |        |
| CONNECTIVE TISSUE | ●    | ●   | ●    | ●    | ●     | ●     | ●    | ●    | ●       | ●      | ●      | ●      |
| EAR               | ●    | ●   | ●    |      |       | ●     | ●    | ●    | ●       |        | ●      |        |
| EMBRYONIC TISSUE  | ●    | ●   | ●    | ●    | ●     | ●     | ●    | ●    | ●       | ●      | ●      | ●      |
| ESOPHAGUS         |      |     |      |      |       |       | ●    |      |         |        |        | ●      |
| EYE               | ●    | ●   | ●    | ●    |       | ●     | ●    | ●    | ●       | ●      | ●      | ●      |
| HEART             | ●    | ●   | ●    |      |       | ●     | ●    | ●    | ●       | ●      | ●      | ●      |
| INTESTINE         | ●    | ●   | ●    | ●    | ●     | ●     | ●    | ●    | ●       | ●      | ●      | ●      |
| KIDNEY            | ●    | ●   | ●    | ●    |       | ●     | ●    | ●    | ●       | ●      | ●      | ●      |
| LARYNX            |      | ●   | ●    | ●    |       |       | ●    | ●    |         |        | ●      |        |



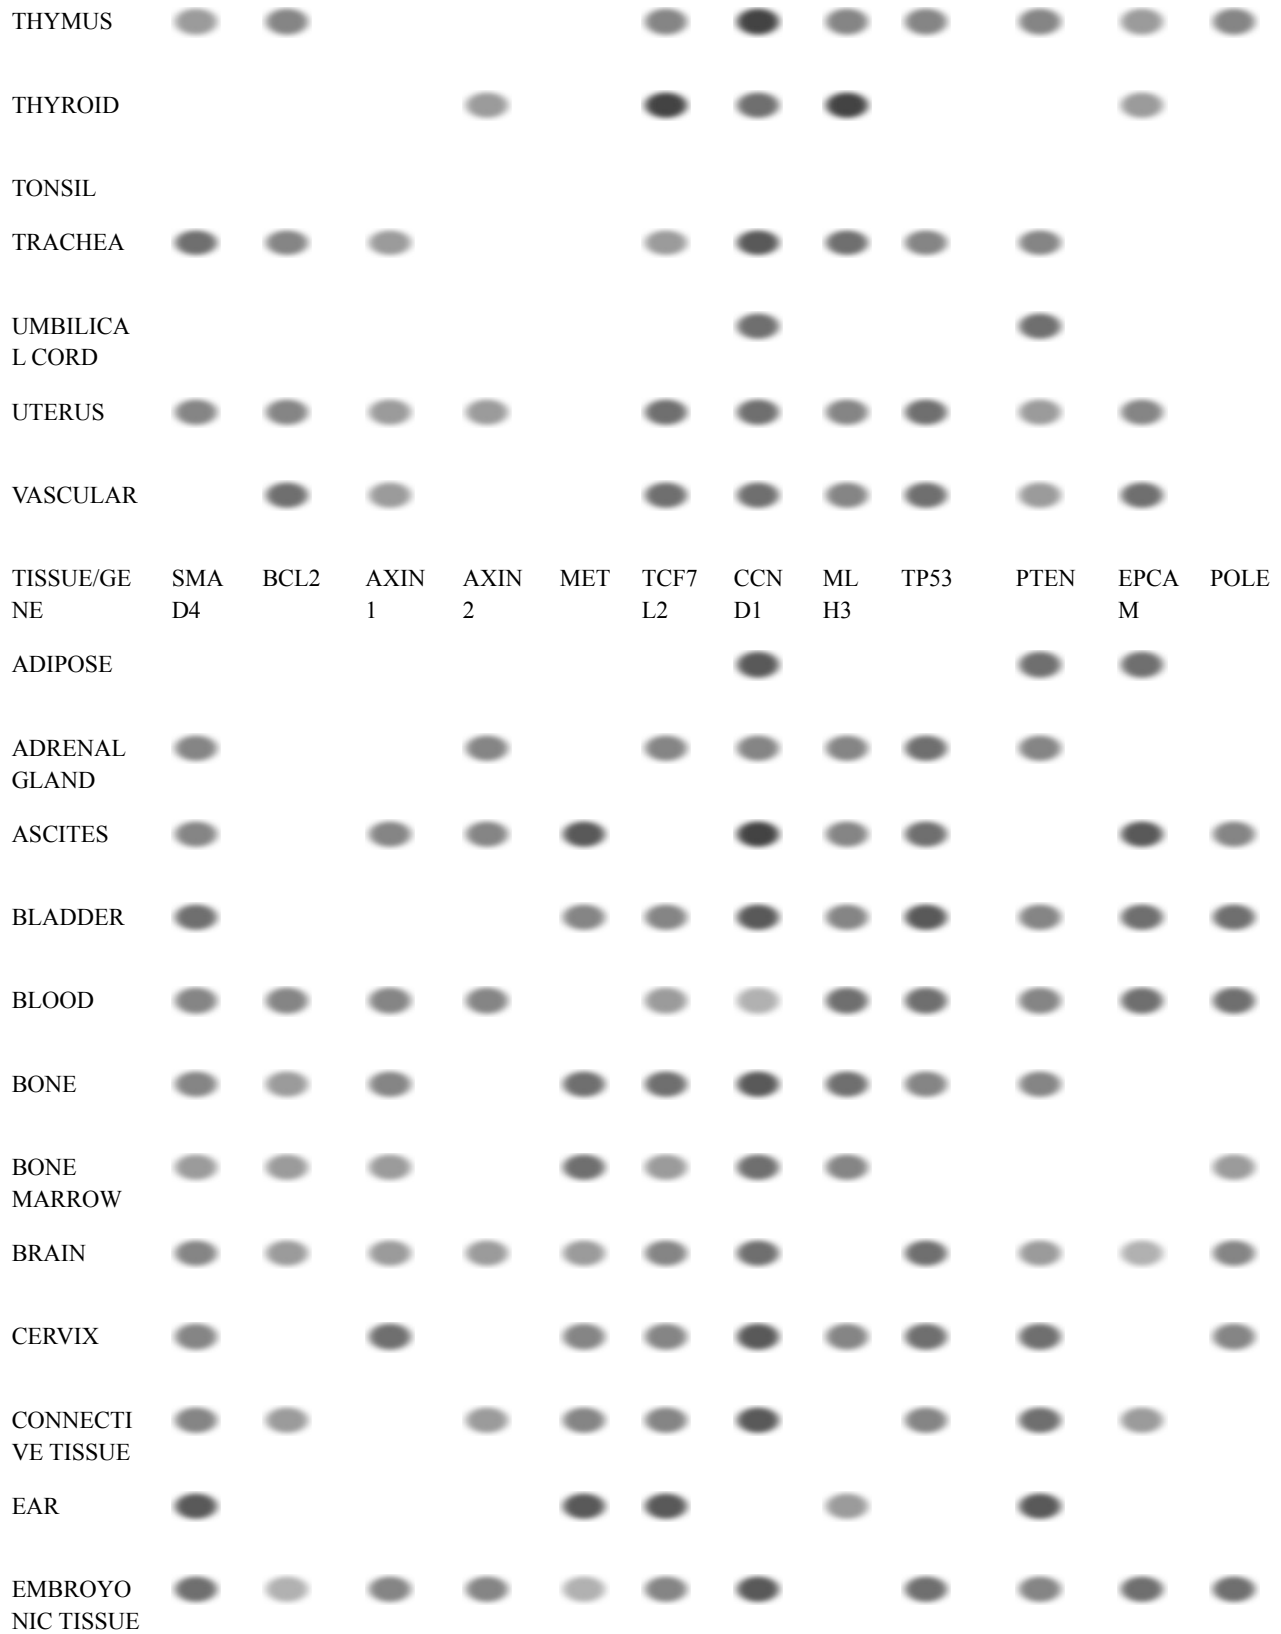



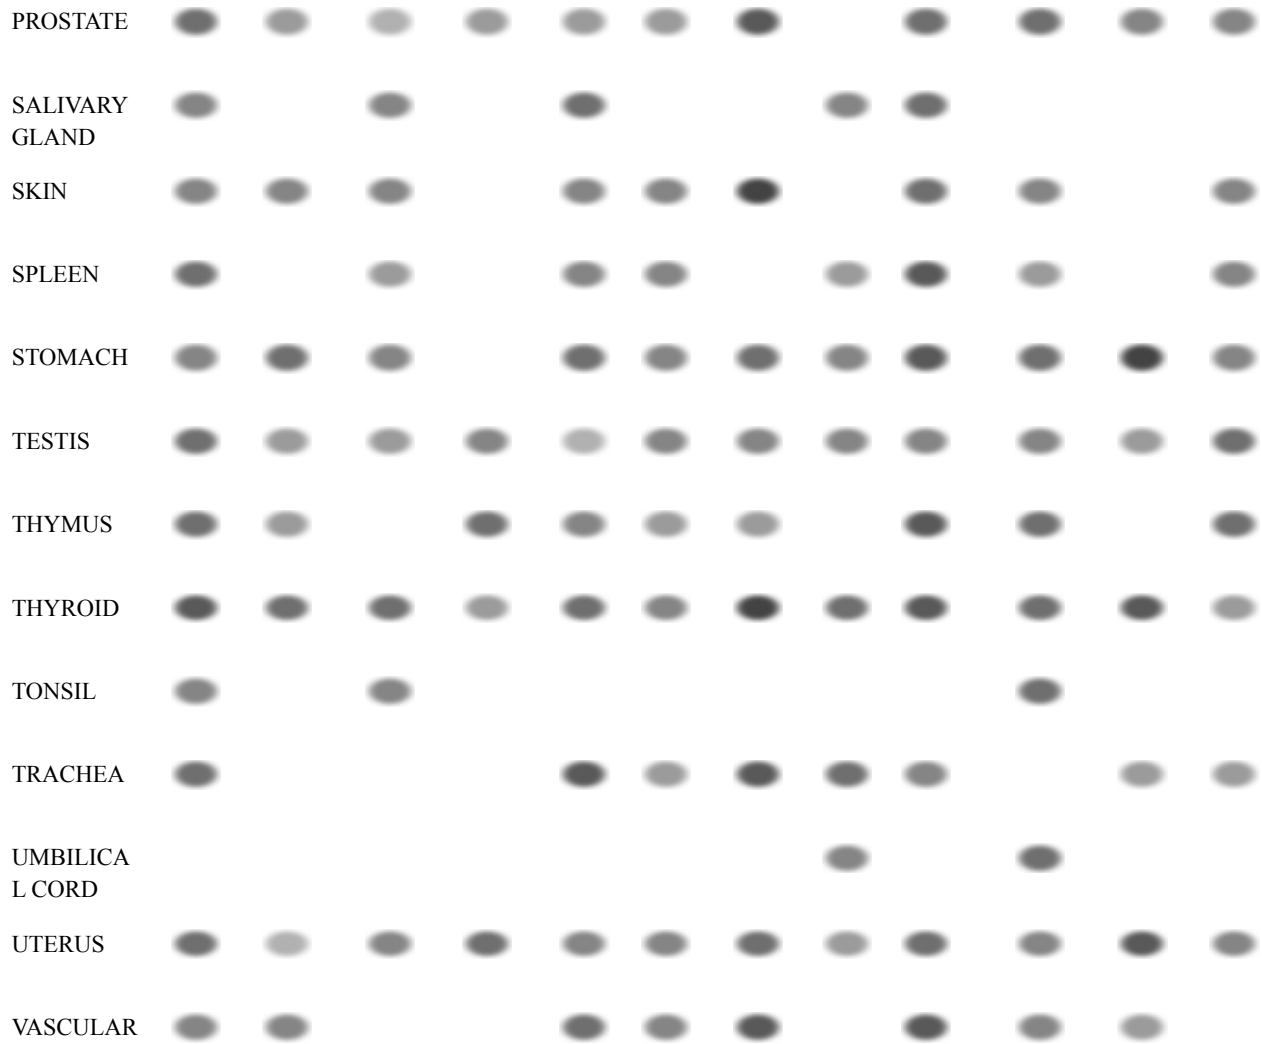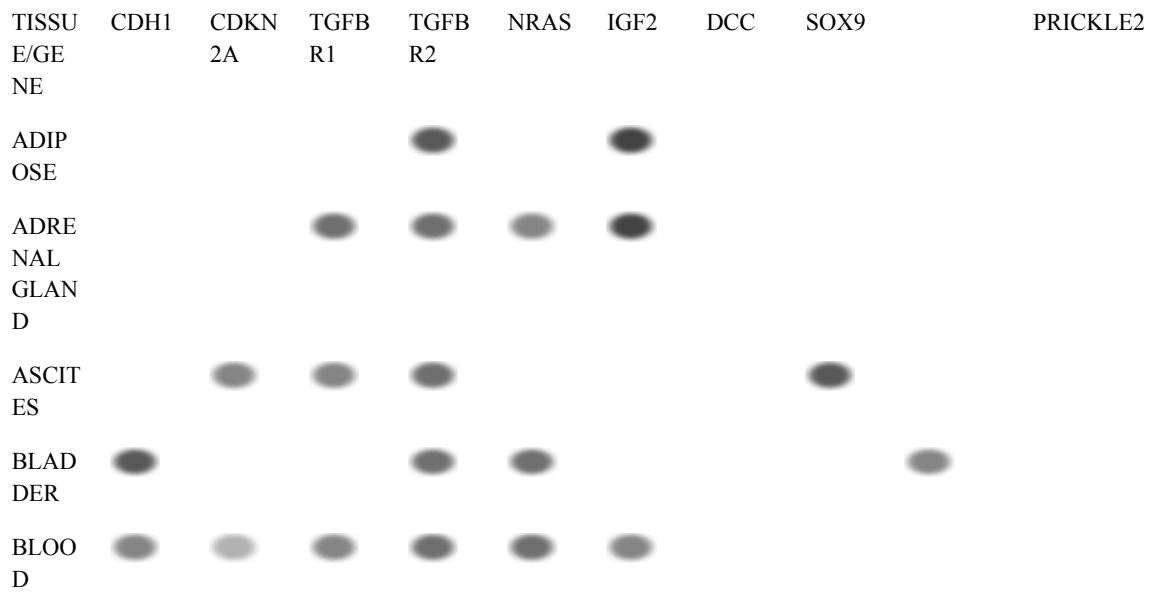

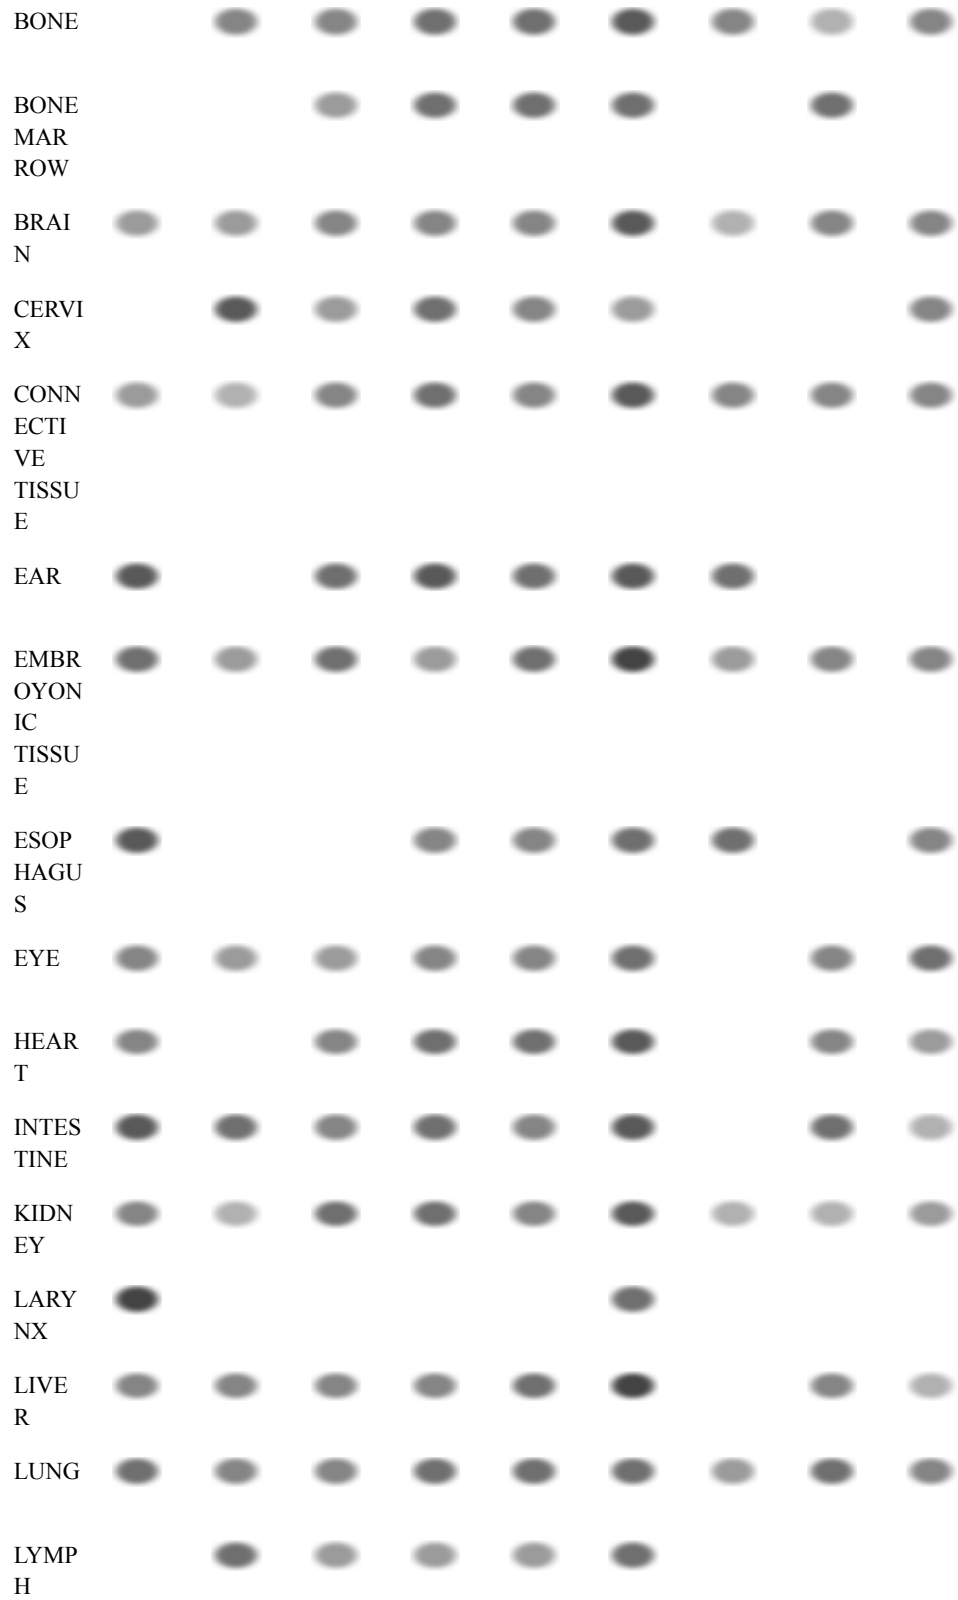



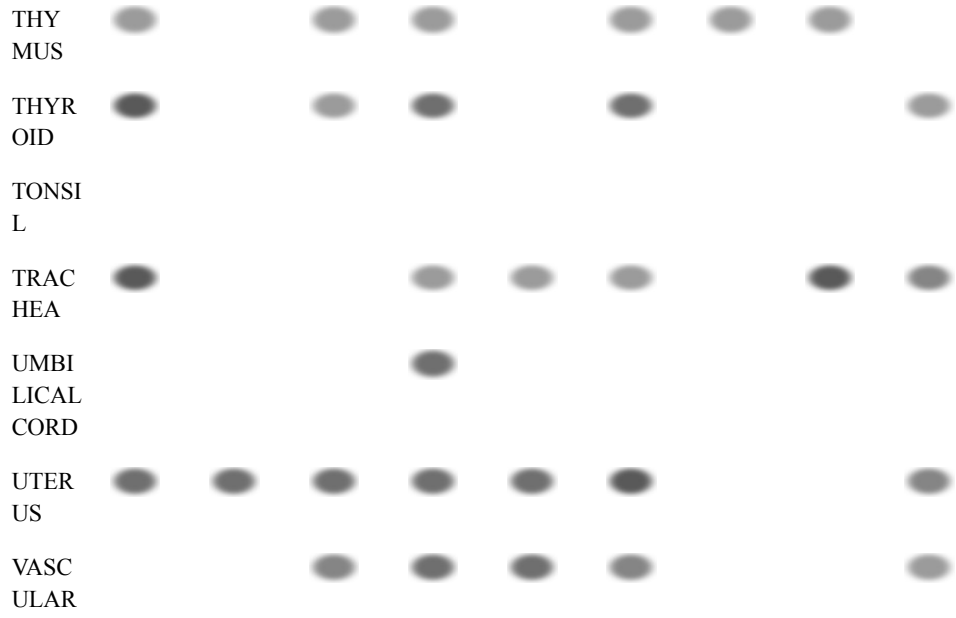

Supplement: f1 [file 547154.f1.pdf]
